# Supplementary material for: Exosome P4HA3 is a Potential Diagnostic and Prognostic Biomarker in Gastric Cancer
Source: Research Square preprint supplement (doi:10.21203/rs.3.rs-7684942/v1), 2025-11-03
Supplement: Supplementary file 1 [file af574bff030ba344d49aa7af.xlsx]

## Sheet: Sheet1
Animal ID	Group	Day	Tumor Length (mm)	Tumor Width (mm)	​Tumor Volume (mm³)​​	Body Weight (g)	Tumor Weight (g)
Mouse 1	Si-P4HA3	0	-	-	-	17.8	-
Mouse 1	Si-P4HA3	2	-	-	-	17.9	-
Mouse 1	Si-P4HA3	4	-	-	-	17.9	-
Mouse 1	Si-P4HA3	6	3.5	2.5	11	18	-
Mouse 1	Si-P4HA3	8	3.6	2.7	13.1	18.1	-
Mouse 1	Si-P4HA3	10	4.1	2.9	17.2	18.3	-
Mouse 1	Si-P4HA3	12	5.2	3.3	28.3	18.8	-
Mouse 1	Si-P4HA3	14	5.6	3.7	38.3	19.8	-
Mouse 1	Si-P4HA3	16	7	4.8	80.6	21.1	-
Mouse 1	Si-P4HA3	18	7.5	5.1	97.5	21.5	-
Mouse 1	Si-P4HA3	20	7.8	5.4	113.7	22.5	-
Mouse 1	Si-P4HA3	22	8	5.7	130	22.7	0.43
Mouse 2	Si-P4HA3	0	-	-	-	17.8	-
Mouse 2	Si-P4HA3	2	-	-	-	17.8	-
Mouse 2	Si-P4HA3	4	-	-	-	17.8	-
Mouse 2	Si-P4HA3	6	3.6	2.4	10.4	18	-
Mouse 2	Si-P4HA3	8	4	2.6	13.5	18.2	-
Mouse 2	Si-P4HA3	10	4.8	2.8	18.8	18.6	-
Mouse 2	Si-P4HA3	12	5.4	3	24.3	19.4	-
Mouse 2	Si-P4HA3	14	6.3	3.5	38.6	19.9	-
Mouse 2	Si-P4HA3	16	7.2	4.7	79.5	21.2	-
Mouse 2	Si-P4HA3	18	7.2	5.2	97.3	21.6	-
Mouse 2	Si-P4HA3	20	7.9	5.4	115.1	22.5	-
Mouse 2	Si-P4HA3	22	8.2	5.6	128.5	22.7	0.35
Mouse 3	Si-P4HA3	0	-	-	-	17.8	-
Mouse 3	Si-P4HA3	2	-	-	-	17.9	-
Mouse 3	Si-P4HA3	4	2.3	2.1	5.1	18.1	-
Mouse 3	Si-P4HA3	6	3.1	2.6	10.5	18.3	-
Mouse 3	Si-P4HA3	8	3.3	2.7	12	18.7	-
Mouse 3	Si-P4HA3	10	3.9	3.2	20	19.3	-
Mouse 3	Si-P4HA3	12	4.6	3.4	26.6	19.9	-
Mouse 3	Si-P4HA3	14	5.6	3.9	42.6	20.3	-
Mouse 3	Si-P4HA3	16	7.1	4.8	81.8	21.6	-
Mouse 3	Si-P4HA3	18	7.6	5.1	98.8	22	-
Mouse 3	Si-P4HA3	20	8	5.4	116.6	22.4	-
Mouse 3	Si-P4HA3	22	8.4	5.6	131.7	22.9	0.45
Mouse 1	Si-NC	0	-	-	-	17.8	-
Mouse 1	Si-NC	2	-	-	-	17.8	-
Mouse 1	Si-NC	4	-	-	-	18.1	-
Mouse 1	Si-NC	6	3.9	3	17.6	18.3	-
Mouse 1	Si-NC	8	5.3	3.3	28.9	18.6	-
Mouse 1	Si-NC	10	6.5	3.8	46.9	19.2	-
Mouse 1	Si-NC	12	7.6	4.7	83.9	20.6	-
Mouse 1	Si-NC	14	8.3	5.8	139.6	23	-
Mouse 1	Si-NC	16	9.1	6.3	180.6	24.1	-
Mouse 1	Si-NC	18	9.8	7	240.1	25.5	-
Mouse 1	Si-NC	20	11.1	7.4	303.9	27.3	-
Mouse 1	Si-NC	22	12.1	7.7	358.7	28.9	0.75
Mouse 2	Si-NC	0	-	-	-	17.8	-
Mouse 2	Si-NC	2	-	-	-	17.8	-
Mouse 2	Si-NC	4	-	-	-	18.1	-
Mouse 2	Si-NC	6	4	3.2	20.5	18.5	-
Mouse 2	Si-NC	8	5	3.6	32.4	18.9	-
Mouse 2	Si-NC	10	5.9	3.9	44.8	19.4	-
Mouse 2	Si-NC	12	7.3	4.8	84.1	20.9	-
Mouse 2	Si-NC	14	8.6	5.7	139.7	23	-
Mouse 2	Si-NC	16	9.6	6.1	178.6	24.6	-
Mouse 2	Si-NC	18	10.7	6.7	240.2	26.3	-
Mouse 2	Si-NC	20	11.4	7.3	304.8	27.7	-
Mouse 2	Si-NC	22	12.4	7.6	358.1	30.7	0.77
Mouse 3	Si-NC	0	-	-	-	17.8	-
Mouse 3	Si-NC	2	-	-	-	17.8	-
Mouse 3	Si-NC	4	2	2.2	4.84	17.9	-
Mouse 3	Si-NC	6	4	3.3	21.8	18.5	-
Mouse 3	Si-NC	8	6	3.4	34.6	18.9	-
Mouse 3	Si-NC	10	6.3	3.9	48	19.4	-
Mouse 3	Si-NC	12	8.2	4.6	86.8	20.8	-
Mouse 3	Si-NC	14	9.7	5.4	141.4	22.7	-
Mouse 3	Si-NC	16	10.4	5.9	181	24.1	-
Mouse 3	Si-NC	18	11.2	6.6	243.9	26.2	-
Mouse 3	Si-NC	20	11.8	7.2	305.9	28.4	-
Mouse 3	Si-NC	22	12.2	7.7	361.7	30.4	1.01
